# Supplementary material
Source: MDPI journal article supplement (https://www.mdpi.com/2072-4292/13/15/2853)
Supplement: s1 [file s1]

## Supplementary Material, Figure S1.

### Google Earth Engine code used to extract total pixel count for each land cover/land use type

```
Google Earth Engine Search places and datasets...

Final Project/MapBIOMAS - SP Annual Land Cover Get Link Save Run Reset Apps

1 //Create feature for Sao Paulo Boundary
2 var Admins = ee.FeatureCollection("FAO/GAUL/2015/level1");
3 var SaoPaulo = Admins.filter(ee.Filter.eq('ADM1_NAME', 'Sao Paulo'));
4 // print(SaoPaulo);
5 //Map.addLayer(SaoPaulo, {}, 'Sao Paulo');
6 Map.centerObject(SaoPaulo, 6);
7
8 // import images from Mapbiomas project
9 var MapBiomas = ee.Image('projects/mapbiomas-workspace/public/collection5/mapbiomas_collection50_integration_v1');
10
11 // return number of pixels for each classification type for full Mapbiomas project (1985-2019)
12 var frequency = MapBiomas.reduceRegion({
13   reducer: ee.Reducer.frequencyHistogram(),
14   geometry: SaoPaulo,
15   scale: 300,
16   maxPixels: 104744501200
17 });
18 print(frequency); // select data from relevant years only (2002-2017)
19
20 // Rename objects to reflect Mapbiomas classes
21 // Lookup table based on https://mapbiomas-br-site.s3.amazonaws.com/_EN_C%3%B3digos_da_legenda_Cole%C3%A7%C3%A3o_5__1_.pdf
22 // "0": "Not Observed"
23 // "1": "Forest"
24 // "2": "Natural Formation",
25 // "3": "Forest Formation",
26 // "4": "Savanna Formation",
27 // "5": "Mangrove",
28 // "9": "Forest Plantation",
29 // "10": "Non Forest Natural Formaton",
30 // "11": "Wetland",
31 // "12": "Grassland Formation",
32 // "32": "Salt Flat",
33 // "29": "Rocky Outcrop",
34 // "13": "Other non Forest Formaton",
35 // "14": "Farming",
36 // "15": "Pasture",
37 // "18": "Agriculture",
38 // "19": "Temporary Crop",
39 // "39": "Soybean",
40 // "20": "Sugar Cane",
41 // "41": "Other Temporary Crops",
42 // "36": "Perennial Crop",
43 // "21": "Mosaic of Agriculture and Pasture",
44 // "22": "Non vegetated area",
45 // "23": "Beach and Dune",
46 // "24": "Urban Infrastructure",
47 // "30": "Mining",
48 // "25": "Other non Vegetated Areas",
49 // "26": "Water",
50 // "33": "River, Lake and Ocean",
51 // "31": "Aquaculture"
52
53 // import project palette
54 var palettes = require('users/mapbiomas/modules/Palettes.js');
55
56 // select year(s) to visualize
57 var startYear = 2002;
58 var midYear = 2010;
59 var endYear = 2017;
60
61 // Each classification year is a band
62 // Apply palette to each selected band year
63 var vis1 = {
64   'bands': ['classification_' + String(startYear)],
65   'min': 0,
66   'max': 34,
67   'palette': palettes.get('classification2')
68 };
69
70 var vis2 = {
71   'bands': ['classification_' + String(midYear)],
72   'min': 0,
73   'max': 34,
74   'palette': palettes.get('classification2')
75 };
76
77 var vis3 = {
78   'bands': ['classification_' + String(endYear)],
79   'min': 0,
80   'max': 34,
81   'palette': palettes.get('classification2')
82 };
83
84 Map.addLayer(MapBiomas.clip(SaoPaulo), vis1, 'Land use for ' + startYear.toString(), true);
85 Map.addLayer(MapBiomas.clip(SaoPaulo), vis2, 'Land use for ' + midYear.toString(), true);
86 Map.addLayer(MapBiomas.clip(SaoPaulo), vis3, 'Land use for ' + endYear.toString(), true);
87
```

## Supplementary Material, Figure S2.

Google Earth Engine code used to create yearly burned area mask to calculate total number of pixel for each land cover/land use type in an area with a MODIS detected fire event

```
Google Earth Engine Search places and datasets...

Sao Paulo/MODIS monthly burned areas Get Link Save Run Reset Apps

1 // Study period 2002 - 2017
2 // Select year here to choose corresponding MODIS data and Mapbiomas classification image
3 var year = 2002;
4
5 var Admins = ee.FeatureCollection("FAO/GAUL/2015/level1");
6 var SaoPaulo = Admins.filter(ee.Filter.eq('ADM1_NAME', 'Sao Paulo'));
7 //print(SaoPaulo);
8
9 // MODIS available dates 2000-02-18T00:00:00 - PRESENT
10 var dataset = ee.ImageCollection('MODIS/006/MCD64A1')
11   .filter(ee.Filter.date(year+'-01-01', year+'-12-31'))
12   .map(function(image){return image.clip(SaoPaulo)});
13
14 // Reduce image collection to a single image per year
15 var annualFires = dataset.reduce(ee.Reducer.median());
16 var firemask = annualFires.select('BurnDate_median');
17 //print(firemask);
18
19 var MapBiomas = ee.Image('projects/mapbiomas-workspace/public/collection5/mapbiomas_collection50_integration_v1')
20   .select('classification_'+year);
21 //print(MapBiomas);
22
23 var firemasked = MapBiomas.updateMask(firemask);
24
25 // Print out the number of burned pixels for each cover type.
26 // Applies the burn mask to all the MapBiomas images
27 // frequency counts will only be correct for the band (year) that corresponds with the MODIS filter year
28
29 var frequency = firemasked.reduceRegion({
30   reducer: ee.Reducer.frequencyHistogram(),
31   geometry: SaoPaulo,
32   scale: 300
33 });
34 //print(String(year) + ' - Aggregate MODIS Monthly Fire ', frequency);
35
36 var dict = ee.Dictionary(frequency.get('classification_' + String(year)));
37 var new_dict = dict.map(function(k,v){
38   return ee.Number(v);
39 });
40
41 // Rename objects to reflect MapBIOMAS classes
42 // Names retrieved from able based on https://mapbiomas-br-site.s3.amazonaws.com/_EN_C%C3%B3digos_da_legenda_Cole%C3%A7%C3%A3o_5_1_.pdf
43 // Comment out types when not included in annual classification
44
45
46 var landcover = ee.Dictionary({
47   //1: "Forest", //2: "Natural Formation",
48   "3": "Forest Formation",
49   "4": "Savanna Formation",
50   //5: "Mangrove",
51   "9": "Forest Plantation",
52   //10: "Non Forest Natural Formaton",
53   "11": "Wetland",
54   "12": "Grassland Formation",
55   //13: "Salt Flat",
56   "29": "Rocky Outcrop",
57   "13": "Other non Forest Formations",
58   //14: "Farming",
59   "15": "Pasture",
60   //18: "Agriculture", //19: "Temporary Crop",
61   "39": "Soybean",
62   "20": "Sugar Cane",
63   "41": "Other Temporary Crops",
64   "36": "Perennial Crop",
65   "21": "Mosaic of Agriculture and Pasture",
66   //22: "Non vegetated area", //23: "Beach and Dune",
67   "24": "Urban Infrastructure",
68   "30": "Mining",
69   "25": "Other non Vegetated Areas",
70   //26: "Water",
71   "33": "River, Lake and Ocean",
72   //31: "Aquaculture", //0: "Not Observed",
73 });
74
75 print(String(year) + ' - Aggregate MODIS Monthly Fire ', new_dict.rename({
76   from: landcover.keys(),
77   to: landcover.values()
78 }));
79
80 // color only outline of SP, no fill color
81 var empty = ee.Image().byte();
82 var outline = empty.paint({
83   featureCollection: SaoPaulo,
84   color: 1,
85   width: 3
86 });
87 Map.addLayer(outline, {palette: 'black'}, 'Sao Paulo State');
88 Map.addLayer(firemasked, {palette: 'red'}, 'Fire Events');
```

**Supplementary Material, Table S1.**

**Sum totals of the gross added value of agriculture, gross added value across all sectors, gross domestic product (GDP), annual inflation rate for Brazil, and inflation corrected GDP**

| <b>Year</b> | <b>Sum of gross added value of agriculture</b> | <b>Sum of total gross added value</b> | <b>Sum of gross Domestic Product</b> | <b>Inflation rate</b> | <b>Corrected GDP</b> |
|-------------|------------------------------------------------|---------------------------------------|--------------------------------------|-----------------------|----------------------|
| <b>2002</b> | \$ 14,112,139.40                               | \$ 430,781,193.23                     | \$ 518,878,815.17                    | 8.45%                 | \$ 475,033,555.29    |
| <b>2003</b> | \$ 15,683,499.10                               | \$ 492,825,390.86                     | \$ 591,454,031.64                    | 14.71%                | \$ 504,451,143.58    |
| <b>2004</b> | \$ 14,796,608.49                               | \$ 539,425,320.93                     | \$ 652,955,557.52                    | 6.60%                 | \$ 609,860,490.72    |
| <b>2005</b> | \$ 15,586,855.31                               | \$ 619,285,178.45                     | \$ 743,042,944.44                    | 6.87%                 | \$ 691,995,894.16    |
| <b>2006</b> | \$ 19,562,571.87                               | \$ 686,836,869.88                     | \$ 824,529,299.05                    | 4.18%                 | \$ 790,063,974.35    |
| <b>2007</b> | \$ 21,201,862.17                               | \$ 782,245,713.72                     | \$ 935,653,179.99                    | 3.64%                 | \$ 901,595,404.24    |
| <b>2008</b> | \$ 18,004,557.76                               | \$ 854,006,280.55                     | \$ 1,042,510,167.95                  | 5.68%                 | \$ 983,295,590.41    |
| <b>2009</b> | \$ 23,610,343.42                               | \$ 939,371,647.05                     | \$ 1,127,093,826.12                  | 4.89%                 | \$ 1,071,978,938.02  |
| <b>2010</b> | \$ 22,631,448.90                               | \$ 1,071,840,401.68                   | \$ 1,294,695,988.45                  | 5.04%                 | \$ 1,229,443,310.63  |
| <b>2011</b> | \$ 23,370,861.71                               | \$ 1,184,832,820.72                   | \$ 1,436,672,709.02                  | 6.64%                 | \$ 1,341,277,641.14  |
| <b>2012</b> | \$ 23,809,337.25                               | \$ 1,286,699,000.77                   | \$ 1,559,033,443.70                  | 5.54%                 | \$ 1,472,662,990.92  |
| <b>2013</b> | \$ 26,457,535.09                               | \$ 1,419,426,222.29                   | \$ 1,715,238,416.57                  | 6.20%                 | \$ 1,608,893,634.74  |
| <b>2014</b> | \$ 27,335,095.71                               | \$ 1,552,872,896.86                   | \$ 1,858,196,055.49                  | 6.33%                 | \$ 1,740,572,245.18  |
| <b>2015</b> | \$ 26,323,233.63                               | \$ 1,626,004,207.51                   | \$ 1,939,901,907.12                  | 9.03%                 | \$ 1,764,728,764.91  |
| <b>2016</b> | \$ 35,827,656.85                               | \$ 1,725,307,449.73                   | \$ 2,038,757,381.63                  | 8.74%                 | \$ 1,860,569,986.48  |
| <b>2017</b> | \$ 36,514,604.66                               | \$ 1,785,834,012.07                   | \$ 2,119,854,035.00                  | 3.45%                 | \$ 2,046,719,070.79  |

Annual inflation rate from:

<https://www-statista-com.proxy.wexler.hunter.cuny.edu/statistics/270812/inflation-rate-in-brazil/>

**Supplementary Material, Table S2.**

**Yearly total number of by land use/land cover type**

| <b>Year</b> | <b>Wetland</b> | <b>Grassland<br/>Formation</b> | <b>Other non<br/>Forest<br/>Formations</b> | <b>Pasture</b> | <b>Sugar Cane</b> | <b>Mosaic of<br/>Agriculture<br/>and Pasture</b> | <b>Urban<br/>Infrastructure</b> | <b>Other non<br/>Vegetated<br/>Areas</b> |
|-------------|----------------|--------------------------------|--------------------------------------------|----------------|-------------------|--------------------------------------------------|---------------------------------|------------------------------------------|
| <b>2002</b> | 4163           | 14333                          | 725                                        | 1236347        | 335314            | 464572                                           | 75118                           | 1827                                     |
| <b>2003</b> | 4007           | 14132                          | 687                                        | 1189085        | 352904            | 489076                                           | 76264                           | 1476                                     |
| <b>2004</b> | 4227           | 14753                          | 779                                        | 1154094        | 378336            | 489581                                           | 76836                           | 1794                                     |
| <b>2005</b> | 4378           | 15416                          | 805                                        | 1112608        | 397721            | 502164                                           | 77478                           | 1954                                     |
| <b>2006</b> | 4517           | 15566                          | 819                                        | 1056135        | 424991            | 519214                                           | 78045                           | 1904                                     |
| <b>2007</b> | 4621           | 17108                          | 768                                        | 988632         | 488025            | 515703                                           | 80059                           | 2084                                     |
| <b>2008</b> | 4627           | 17135                          | 713                                        | 928460         | 580322            | 493335                                           | 80120                           | 2043                                     |
| <b>2009</b> | 4680           | 16596                          | 752                                        | 889415         | 630219            | 476959                                           | 82651                           | 1700                                     |
| <b>2010</b> | 4828           | 16821                          | 763                                        | 849239         | 644487            | 491907                                           | 84036                           | 1735                                     |
| <b>2011</b> | 4896           | 16803                          | 766                                        | 810603         | 656298            | 507049                                           | 85208                           | 1272                                     |
| <b>2012</b> | 5154           | 15696                          | 777                                        | 760162         | 686928            | 516637                                           | 86446                           | 1464                                     |
| <b>2013</b> | 5495           | 15267                          | 775                                        | 723140         | 708498            | 522678                                           | 88290                           | 1596                                     |
| <b>2014</b> | 5431           | 15108                          | 740                                        | 698922         | 741991            | 504466                                           | 89807                           | 1561                                     |
| <b>2015</b> | 5231           | 15070                          | 683                                        | 684119         | 751562            | 492634                                           | 91319                           | 1567                                     |
| <b>2016</b> | 5335           | 14782                          | 753                                        | 675938         | 755625            | 486701                                           | 92374                           | 1505                                     |
| <b>2017</b> | 5425           | 14641                          | 717                                        | 656637         | 763347            | 480566                                           | 92579                           | 1601                                     |

NOTE: Classification types listed as beach and dune; mining; aquaculture; rocky outcrop; salt flat; and not observed were not transcribed to this table, as combined they represented less than 0.02% of the total land cover per year (fewer than 500 pixels each year, cumulatively) Values were rounded up to the nearest whole number.

**Supplementary Material, Table S2 (continued).**

**Yearly total number of by land use/land cover type**

| <b>Year</b> | <b>Forest Formation</b> | <b>River, Lake and Ocean</b> | <b>Perennial Crop</b> | <b>Soybean</b> | <b>Savanna Formation</b> | <b>Other Temporary Crops</b> | <b>Mangrove</b> | <b>Forest Plantation</b> |
|-------------|-------------------------|------------------------------|-----------------------|----------------|--------------------------|------------------------------|-----------------|--------------------------|
| <b>2002</b> | 577303                  | 67814                        | 254                   | 42743          | 19605                    | 78355                        | 1751            | 70807                    |
| <b>2003</b> | 579432                  | 67903                        | 178                   | 46400          | 20665                    | 75083                        | 1740            | 72000                    |
| <b>2004</b> | 580919                  | 68108                        | 186                   | 48921          | 20219                    | 76354                        | 1736            | 74198                    |
| <b>2005</b> | 582524                  | 68195                        | 245                   | 53014          | 20725                    | 74615                        | 1779            | 77430                    |
| <b>2006</b> | 585001                  | 68287                        | 450                   | 51717          | 20123                    | 81964                        | 1816            | 80493                    |
| <b>2007</b> | 589182                  | 68342                        | 544                   | 45327          | 19736                    | 83984                        | 1832            | 85093                    |
| <b>2008</b> | 592598                  | 68304                        | 606                   | 37842          | 19370                    | 72823                        | 1818            | 90935                    |
| <b>2009</b> | 597563                  | 68395                        | 779                   | 43398          | 18948                    | 61004                        | 1819            | 96160                    |
| <b>2010</b> | 598297                  | 68570                        | 1502                  | 49443          | 18734                    | 57366                        | 1809            | 101483                   |
| <b>2011</b> | 598819                  | 68651                        | 2818                  | 55061          | 19350                    | 54558                        | 1785            | 107068                   |
| <b>2012</b> | 599147                  | 68547                        | 4030                  | 55956          | 18143                    | 58665                        | 1774            | 111442                   |
| <b>2013</b> | 598206                  | 68586                        | 5942                  | 56405          | 17730                    | 61766                        | 1769            | 114824                   |
| <b>2014</b> | 598657                  | 68318                        | 8284                  | 69389          | 16971                    | 52236                        | 1799            | 117255                   |
| <b>2015</b> | 604765                  | 67838                        | 11156                 | 79473          | 17235                    | 47707                        | 1824            | 118728                   |
| <b>2016</b> | 606097                  | 68521                        | 14162                 | 82687          | 17001                    | 46001                        | 1816            | 121590                   |
| <b>2017</b> | 605377                  | 68621                        | 17542                 | 89306          | 16433                    | 52803                        | 1705            | 123587                   |

NOTE: Classification types listed as beach and dune; mining; aquaculture; rocky outcrop; salt flat; and not observed were not transcribed to this table, as combined they represented less than 0.02% of the total land cover per year (fewer than 500 pixels each year, cumulatively) Values were rounded up to the nearest whole number.

**Supplementary Material, Table S3.**

**Overall relative change and absolute change for land use/land cover types between 2002 and 2017**

| Land Cover/Land Use Type                     | 2002-2017<br>Percent (Relative)<br>Change | 2002-2017<br>Absolute Change<br>in Pixel Number |
|----------------------------------------------|-------------------------------------------|-------------------------------------------------|
| <b>Wetland</b>                               | 30.32%                                    | 1262                                            |
| <b>Grassland Formation</b>                   | 2.15%                                     | 308                                             |
| <b>Other non Forest Formations</b>           | -1.11%                                    | -8                                              |
| <b>Pasture</b>                               | -46.89%                                   | -579709                                         |
| <b>Sugar Cane</b>                            | 127.65%                                   | 428033                                          |
| <b>Mosaic of Agriculture and<br/>Pasture</b> | 3.44%                                     | 15994                                           |
| <b>Urban Infrastructure</b>                  | 23.24%                                    | 17461                                           |
| <b>Other non Vegetated Areas</b>             | -12.41%                                   | -227                                            |
| <b>Forest Formation</b>                      | 4.86%                                     | 28075                                           |
| <b>River, Lake and Ocean</b>                 | 1.19%                                     | 807                                             |
| <b>Perennial Crop</b>                        | 6806.17%                                  | 17288                                           |
| <b>Soybean</b>                               | 108.94%                                   | 46564                                           |
| <b>Savanna Formation</b>                     | -16.18%                                   | -3172                                           |
| <b>Other Temporary Crops</b>                 | -32.61%                                   | -25552                                          |
| <b>Mangrove</b>                              | -2.63%                                    | -46                                             |
| <b>Forest Plantation</b>                     | 74.54%                                    | 52780                                           |

**Supplementary Material, Table S4.**

**Yearly total number of burned area pixels by land use/land cover type**

| <b>Year</b> | <b>Wetland</b> | <b>Grassland<br/>Formation</b> | <b>Other non<br/>Forest<br/>Formations</b> | <b>Pasture</b> | <b>Sugar Cane</b> | <b>Mosaic of<br/>Agriculture<br/>and Pasture</b> | <b>Urban<br/>Infrastructure</b> | <b>Other non<br/>Vegetated<br/>Areas</b> |
|-------------|----------------|--------------------------------|--------------------------------------------|----------------|-------------------|--------------------------------------------------|---------------------------------|------------------------------------------|
| <b>2002</b> | 38             | 273                            | 12                                         | 9657           | 52192             | 10331                                            | 206                             | 32                                       |
| <b>2003</b> | 161            | 431                            | 6                                          | 10552          | 57034             | 11159                                            | 93                              | 29                                       |
| <b>2004</b> | 177            | 330                            | 13                                         | 7665           | 55331             | 9215                                             | 68                              | 32                                       |
| <b>2005</b> | 59             | 333                            | 9                                          | 8737           | 62273             | 11650                                            | 180                             | 36                                       |
| <b>2006</b> | 140            | 474                            | 20                                         | 11867          | 78249             | 16276                                            | 162                             | 42                                       |
| <b>2007</b> | 210            | 570                            | 11                                         | 14248          | 88817             | 17392                                            | 117                             | 64                                       |
| <b>2008</b> | 177            | 334                            | 9                                          | 11942          | 74426             | 13665                                            | 89                              | 37                                       |
| <b>2009</b> | 72             | 248                            | 17                                         | 6897           | 55641             | 7693                                             | 32                              | 15                                       |
| <b>2010</b> | 306            | 518                            | 19                                         | 16275          | 103494            | 16644                                            | 121                             | 28                                       |
| <b>2011</b> | 249            | 331                            | 20                                         | 8564           | 69125             | 10325                                            | 67                              | 22                                       |
| <b>2012</b> | 87             | 187                            | 6                                          | 3809           | 41222             | 5090                                             | 46                              | 13                                       |
| <b>2013</b> | 125            | 105                            | 9                                          | 2303           | 25315             | 4033                                             | 24                              | 13                                       |
| <b>2014</b> | 89             | 194                            | 5                                          | 3053           | 36448             | 4699                                             | 108                             | 16                                       |
| <b>2015</b> | 14             | 130                            |                                            | 1500           | 17137             | 1796                                             | 10                              | 5                                        |
| <b>2016</b> | 192            | 130                            |                                            | 2123           | 21883             | 2681                                             | 58                              | 7                                        |
| <b>2017</b> | 429            | 159                            | 3                                          | 2204           | 30825             | 3613                                             | 36                              | 8                                        |

NOTE: Classification types listed as beach and dune; mining; aquaculture; rocky outcrop; salt flat; mangrove; and not observed were not transcribed to this table, as they showed fewer than 10 burned pixels per year

**Supplementary Material, Table S4 (continued).**

**Yearly total number of burned area pixels by land use/land cover type**

| <b>Year</b> | <b>Forest Formation</b> | <b>River, Lake and Ocean</b> | <b>Perennial Crop</b> | <b>Soybean</b> | <b>Savanna Formation</b> | <b>Other Temporary Crops</b> | <b>Forest Plantation</b> |
|-------------|-------------------------|------------------------------|-----------------------|----------------|--------------------------|------------------------------|--------------------------|
| <b>2002</b> | 4830                    | 227                          | 4                     | 710            | 438                      | 2883                         | 422                      |
| <b>2003</b> | 4972                    | 334                          | 2                     | 952            | 424                      | 2969                         | 417                      |
| <b>2004</b> | 3844                    | 240                          |                       | 729            | 428                      | 2487                         | 334                      |
| <b>2005</b> | 4010                    | 227                          | 2                     | 897            | 340                      | 2484                         | 261                      |
| <b>2006</b> | 5360                    | 357                          | 5                     | 998            | 513                      | 3104                         | 413                      |
| <b>2007</b> | 6578                    | 437                          | 17                    | 875            | 660                      | 3350                         | 361                      |
| <b>2008</b> | 4993                    | 341                          | 14                    | 683            | 473                      | 1865                         | 323                      |
| <b>2009</b> | 2998                    | 212                          | 4                     | 1082           | 271                      | 1049                         | 224                      |
| <b>2010</b> | 7490                    | 565                          | 11                    | 1729           | 486                      | 1563                         | 560                      |
| <b>2011</b> | 4391                    | 419                          | 6                     | 2187           | 376                      | 1279                         | 437                      |
| <b>2012</b> | 2439                    | 193                          | 10                    | 710            | 121                      | 827                          | 361                      |
| <b>2013</b> | 1583                    | 103                          | 7                     | 227            | 117                      | 650                          | 190                      |
| <b>2014</b> | 3532                    | 175                          | 33                    | 665            | 228                      | 601                          | 480                      |
| <b>2015</b> | 1034                    | 77                           | 22                    | 263            | 112                      | 230                          | 172                      |
| <b>2016</b> | 1204                    | 94                           | 42                    | 317            | 158                      | 386                          | 199                      |
| <b>2017</b> | 2631                    | 218                          | 35                    | 703            | 201                      | 640                          | 405                      |

NOTE: Classification types listed as beach and dune; mining; aquaculture; rocky outcrop; salt flat; mangrove; and not observed were not transcribed to this table, as they showed fewer than 10 burned pixels per year. Values were rounded up to the nearest whole number.



**Supplementary Material, Table S5.**

**Overall percent change and absolute change in burn frequency for each LULC type between 2002 and 2017**

| Land Cover/Land Use Type                 | 2002-2017<br>Percent (Relative)<br>Change | 2002-2017<br>Absolute Change<br>in Pixel Number |
|------------------------------------------|-------------------------------------------|-------------------------------------------------|
| <b>Wetland</b>                           | 1028.95%                                  | 391                                             |
| <b>Grassland Formation</b>               | -41.76%                                   | -114                                            |
| <b>Other non Forest Formations</b>       | -75.00%                                   | -9                                              |
| <b>Pasture</b>                           | -77.18%                                   | -7452.968627                                    |
| <b>Sugar Cane</b>                        | -40.94%                                   | -21367.42745                                    |
| <b>Mosaic of Agriculture and Pasture</b> | -65.03%                                   | -6718.117647                                    |
| <b>Urban Infrastructure</b>              | -82.52%                                   | -170                                            |
| <b>Other non Vegetated Areas</b>         | -75.00%                                   | -24                                             |
| <b>Forest Formation</b>                  | -45.53%                                   | -2199.34902                                     |
| <b>River, Lake and Ocean</b>             | -4.34%                                    | -9.878431373                                    |
| <b>Perennial Crop</b>                    | 775.00%                                   | 31                                              |
| <b>Soybean</b>                           | -0.99%                                    | -7                                              |
| <b>Savanna Formation</b>                 | -54.00%                                   | -236.5215686                                    |
| <b>Other Temporary Crops</b>             | -77.80%                                   | -2242.956863                                    |
| <b>Forest Plantation</b>                 | -4.03%                                    | -17                                             |

**Supplementary Material, Table S6.**

**Total monthly number of MODIS detected burned area pixels**

|            | 2002 | 2003 | 2004 | 2005 | 2006 | 2007 | 2008 | 2009 | 2010  | 2011  | 2012 | 2013 | 2014 | 2015 | 2016 | 2017 |
|------------|------|------|------|------|------|------|------|------|-------|-------|------|------|------|------|------|------|
| <b>Jan</b> | 315  | 41   | 82   | 78   | 249  | 217  | 106  | 115  | 89    |       | 185  | 63   | 206  | 34   | 106  | 6    |
| <b>Feb</b> | 70   | 211  | 148  | 238  | 187  | 353  | 118  | 236  | 341   | 83    | 211  | 55   | 136  |      | 122  | 74   |
| <b>Mar</b> | 177  | 181  | 88   | 209  | 323  | 305  | 202  | 872  | 421   | 161   | 214  | 111  | 93   | 2    | 180  | 39   |
| <b>Apr</b> | 896  | 989  | 358  | 2033 | 2116 | 2200 | 684  | 2973 | 2377  | 803   | 295  | 569  | 268  | 52   | 1020 | 100  |
| <b>May</b> | 2549 | 3539 | 1338 | 4382 | 7313 | 3927 | 2622 | 3778 | 4011  | 3797  | 669  | 974  | 1050 | 124  | 291  | 213  |
| <b>Jun</b> | 4150 | 5971 | 2317 | 3784 | 5579 | 6611 | 3973 | 2950 | 5674  | 2984  | 838  | 351  | 1363 | 308  | 729  | 564  |
| <b>Jul</b> | 5263 | 4806 | 4849 | 6408 | 8399 | 5476 | 6225 | 4293 | 7053  | 5092  | 2865 | 1881 | 2397 | 1304 | 2221 | 1753 |
| <b>Aug</b> | 5114 | 5926 | 6612 | 6724 | 7101 | 8881 | 7063 | 4858 | 14238 | 10036 | 5407 | 3682 | 3892 | 2997 | 2671 | 4499 |
| <b>Sep</b> | 3373 | 5657 | 6646 | 4454 | 4559 | 9653 | 9685 | 2059 | 12634 | 7949  | 4952 | 2493 | 4552 | 1467 | 1556 | 4964 |
| <b>Oct</b> | 5292 | 2192 | 2075 | 1253 | 1798 | 6038 | 1333 | 2582 | 1636  | 1556  | 1565 | 661  | 2811 | 904  | 756  | 1272 |
| <b>Nov</b> | 322  | 568  | 1854 | 1136 | 1898 | 1234 | 3424 | 584  | 1770  | 371   | 990  | 507  | 193  | 288  | 163  | 300  |
| <b>Dec</b> | 308  | 74   | 808  | 167  | 191  | 402  | 1458 | 511  | 478   | 182   | 301  | 284  | 73   | 49   | 124  | 353  |
